# Evolutionary inferences about quantitative traits are affected by underlying genealogical discordance

Fábio K. Mendes<sup>1\*</sup>, Jesualdo A. Fuentes-González<sup>1,2</sup>, Joshua G. Schraiber<sup>3,4,5</sup>, and  
Matthew W. Hahn<sup>1,6</sup>

5

<sup>1</sup>Department of Biology, Indiana University, Bloomington, IN, 47405, USA. <sup>2</sup>School of  
Life Sciences, Arizona State University, Tempe, AZ, 85287, USA. <sup>3</sup>Department of  
Biology, Temple University, Philadelphia, PA, 19122, USA. <sup>4</sup>Center for Computational  
Genetics and Genomics, Temple University, Philadelphia, PA, 19122, USA. <sup>5</sup>Institute  
10 for Genomics and Evolutionary Medicine, Temple University, Philadelphia, PA, 19122,  
USA. <sup>6</sup>Department of Computer Science, Indiana University, Bloomington, IN, 47405,  
USA.

\*e-mail: [fkmenedes@indiana.edu](mailto:fkmenedes@indiana.edu)

15

20

## Abstract

25           Modern phylogenetic methods used to study how traits evolve often require a single  
species tree as input, and do not take underlying gene tree discordance into account. Such  
approaches may lead to errors in phylogenetic inference because of hemiplasy — the  
process by which single changes on discordant trees appear to be homoplastic when  
analyzed on a fixed species tree. Hemiplasy has been shown to affect inferences about  
30   discrete traits, but it is still unclear whether complications arise when quantitative traits  
are analyzed. In order to address this question and to characterize the effect of hemiplasy  
on traits controlled by a large number of loci, we present a multispecies coalescent model  
for quantitative traits evolving along a species tree. We demonstrate theoretically and  
through simulations that hemiplasy decreases the expected covariances in trait values  
35   between more closely related species relative to the covariances between more distantly  
related species. This effect leads to an overestimation of a trait's evolutionary rate  
parameter, to a decrease of the trait's phylogenetic signal, and to increased false positive  
rates in comparative methods such as the phylogenetic ANOVA. We also show that  
hemiplasy affects discrete, threshold traits that have an underlying continuous liability,  
40   leading to false inferences of convergent evolution. The number of loci controlling a  
quantitative trait appears to be irrelevant to the trends reported, for all analyses. Our  
results demonstrate that gene tree discordance and hemiplasy are a problem for all types  
of traits, across a wide range of methods. Our analyses also point to the conditions under  
which hemiplasy is most likely to be a factor, and suggest future approaches that may  
45   mitigate its effects.

## Introduction

Understanding how traits evolve through time is one of the major goals of phylogenetics. Phylogenetic inferences made about traits can include estimating a trait's evolutionary rate and ancestral states, determining whether the evolution of a trait is influenced by natural selection, and establishing whether certain character states make speciation and extinction more or less likely<sup>1-3</sup>. Despite the variety of questions one can ask, and the plethora of different discrete and continuous traits that can be studied, it has long been recognized that in order to make inferences about trait evolution it is imperative to consider how the species carrying these traits are related<sup>4</sup>. Phylogenetic comparative methods model traits as evolving along a phylogeny, and therefore often require one, or sometimes multiple, species trees as input<sup>3,5,6</sup>.

The unprecedented increase in the availability of molecular data has been a boon to the construction of well-supported species trees — i.e., those with high levels of statistical support. Thanks to advances in sequencing technology, species trees are now denser, taller, and better resolved. In contrast to the high levels of support provided by genome-scale data, phylogenomic studies have also revealed topological discordance between gene trees to be pervasive across the tree of life<sup>7-13</sup>. Gene trees can disagree with one another and with the species tree because of technical reasons — e.g., model misspecification, low phylogenetic signal, or the mis-identification of paralogs as orthologs — but also as a result of biological phenomena such as incomplete lineage sorting (ILS), introgression, and horizontal gene transfer<sup>14</sup>. Among the latter, ILS is well-studied due to its conduciveness to mathematical characterization<sup>15-17</sup>, in addition to being an inevitable result of population processes<sup>18</sup>. Going backwards in time, ILS is said to occur when lineages from

70 the same population do not coalesce in that population, but instead coalesce in a more  
ancestral population. If these lineages then happen to coalesce first with others from more  
distantly related populations, the gene tree will be discordant with the species tree.

While it is becoming clear that genealogical discordance is the rule rather than the  
exception in species trees with short internal branches, the manner in which it might  
75 affect studies of trait evolution is still not well understood. One way gene tree discordance  
can affect phylogenetic inferences is by increasing the risk of hemiplasy. Hemiplasy is the  
production of a homoplasy-like pattern by a non-homoplastic event<sup>19</sup>, generally because a  
character-state transition has occurred on a discordant gene tree. Consider the example  
shown in figure 1: trait 1 is underlain by a gene whose topology is discordant with the  
80 species tree; a single state transition occurs only once along the branch leading to the  
ancestor of species A and C. However, if one attempts to infer the history of transitions on  
the species tree, two spurious transitions (for instance, on branches leading to A and C)  
must be invoked. The same occurs with trait 2 (Fig. 1), but on the other discordant gene  
tree. Unless the gene tree underlying a discrete trait is concordant with the species tree  
85 (such as trait 3 in Fig. 1), ignoring its topology can lead one to believe that homoplasy has  
happened, when in fact it has not — this is due to hemiplasy.

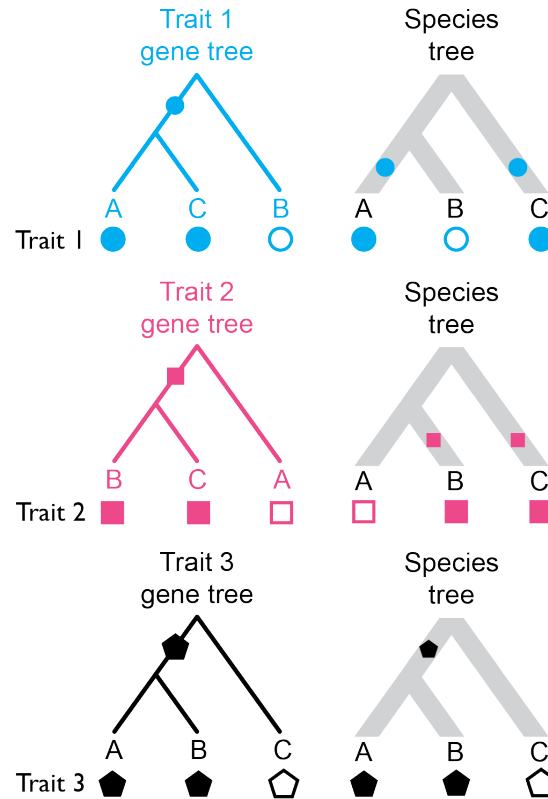

**Figure 1:** Three distinct discrete traits with their states mapped to the gene trees they evolved on, and to the species tree. Hollow and filled shapes represent the ancestral and derived states, respectively, with character state transitions being indicated by filled shapes along internal branches. Traits 1 and 2 undergo a single character-state transition in their evolutionary history, but when the states are resolved on the species tree, a homoplasy-like (yet not truly homoplastic) pattern emerges (i.e., hemiplasy). Trait 3 has evolved along a gene tree that matches the species tree in topology, and so no hemiplasy occurs.

Recent work on the relevance of gene tree discordance to phylogenetic inferences has demonstrated that hemiplasy is widespread and problematic. At the molecular level, hemiplasy can cause apparent substitution rate variation, can spuriously increase the  
90 detection of positive selection in coding sequences, and can lead to artefactual signals of convergence<sup>20,21</sup>. In datasets with high levels of gene tree discordance, the fraction of all substitutions that are hemiplastic can be quite high<sup>22</sup>.

An interesting and still unanswered question is whether phylogenetic inferences  
95 about continuous traits can also be affected by hemiplasy. As continuous traits are often  
underlain by a large number of loci, a significant fraction of them could have discordant  
gene trees in the presence of ILS or introgression. Trait-affecting substitutions on  
discordant internal branches (those that are absent from the species tree<sup>23</sup>) of such trees  
would then increase the similarity in traits between more distantly related species, while  
100 decreasing that of more closely related species. Such an effect could consequently affect  
the inferences from phylogenetic comparative methods about these quantitative traits. On  
the other hand, the most frequent gene tree in a data set is generally expected to be  
concordant with the species tree (except in cases of anomalous gene trees<sup>24</sup>). As a  
consequence, we might expect that the contribution to traits from loci with concordant  
105 gene trees would outweigh the signal introduced by loci with discordant gene trees,  
possibly making phylogenetic inferences about continuous traits more robust to  
hemiplasy relative to discrete traits. In other words, a reasonable hypothesis is that gene  
tree discordance should only be problematic for traits controlled by a small number of  
loci, but not for those controlled by many loci<sup>6</sup>.

110 Here, we investigate whether standard phylogenetic methods for studying  
quantitative traits are affected by genealogical discordance and hemiplasy. We present a  
model of quantitative traits evolving under the multispecies coalescent and derive the  
expected variances and covariances in quantitative traits under this model. We then apply  
phylogenetic comparative methods to data simulated under the coalescent framework.  
115 This framework makes it possible to vary levels of ILS and the number of loci controlling a  
quantitative trait (cf. ref. 25), and so we also address whether inferences can be affected by

variation in genetic architecture. Finally, we use the threshold model<sup>26,27</sup> to investigate whether discretizing quantitative traits makes inferences about them more or less robust to the potential effects of gene tree discordance and hemiplasy.

120

### **Characterizing trait distributions in the three-species case under the coalescent and Brownian motion models**

To investigate the effect of discordance and hemiplasy on inferences about quantitative traits, we first compare expectations for quantitative traits under the coalescent model relative to Brownian motion (BM), a diffusion model commonly used in phylogenetic comparative methods, using a three-species phylogeny. Under BM, trait values from multiple species will exhibit a multivariate normal distribution with the covariance structure given by the phylogeny<sup>28</sup>. More specifically, in the case of  $n$  species, the variances within species and covariance between species are given by  $\mathbf{V} = \sigma^2 \mathbf{T}$ , the variance-covariance matrix. Here,  $\sigma^2$  is the evolutionary rate parameter, which measures how much change is expected in an infinitesimal time interval.  $\mathbf{T}$  is an  $n \times n$  matrix whose off-diagonal entries,  $t_{ij}$ , are lengths of the internal branches subtending the ancestor of species  $i$  and  $j$ , and whose diagonal entries correspond to the lengths of the paths between each species and the root<sup>28</sup>. For the phylogeny in figure 2a, and  $\sigma^2 = 1$ :

125  
130

$$\mathbf{V} = \sigma^2 \mathbf{T} = \sigma^2 \begin{bmatrix} t_{11} & t_{12} & t_{13} \\ t_{21} & t_{22} & t_{23} \\ t_{31} & t_{32} & t_{33} \end{bmatrix} = \begin{bmatrix} 5 & 4 & 0 \\ 4 & 5 & 0 \\ 0 & 0 & 5 \end{bmatrix} \quad (1)$$

135

For example, the BM expected variance in species  $A$ ,  $Var_{BM}(A)$ , corresponds to the rate parameter multiplied by the length of the path extending from the root to the tip, and therefore evaluates to 5. Note that  $Var_{BM}(A)$  is not the population trait variance observed

among individuals of  $A$ , but the expected variance in species  $A$ 's mean trait value, resulting  
 140 from evolution along the lineage leading to  $A$ . The covariance between species  $A$  and  $B$ ,  
 $COV_{BM}(A, B)$ , corresponds to the rate parameter multiplied by the length of the branch  
 shared by these two lineages, which evaluates to 4 in this example.

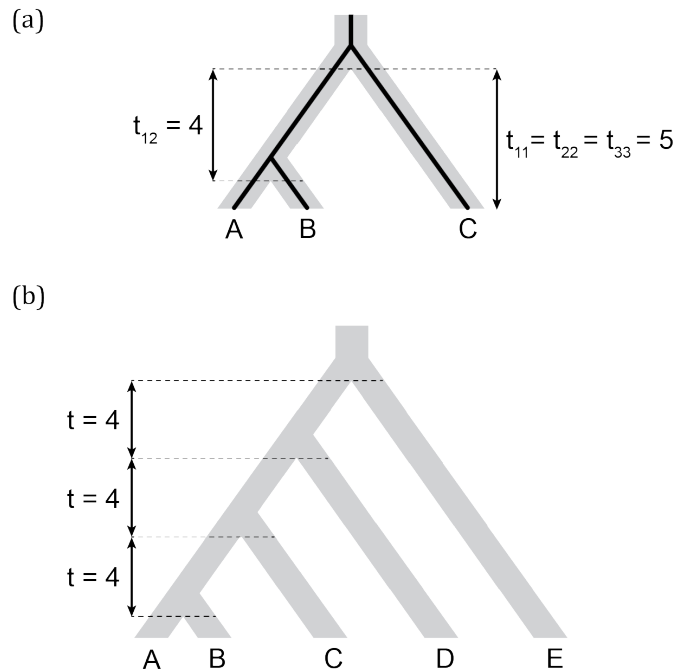

**Figure 2:** (a) Three-species phylogeny (and a concordant gene tree within it) and its corresponding  $T$  matrix entries. (b) Five-species phylogeny used in coalescent simulations for PCM analyses. Branch lengths are indicated in units of  $2N$  generations.

Given the species tree topology in figure 2a, the expected variance in trait value  
 145 within any species,  $A$ ,  $B$ , or  $C$ , is also readily derived under a neutral coalescent model (for  
 a complete derivation, see section 1.1 in the Supplementary Text):

$$Var_{Coal} = 2N\mu\sigma_M^2 \left[ t_e + (1 - e^{-t/2N}) \left( \frac{t}{2N} + 1 \right) + (e^{-t/2N}) \left( \frac{t}{2N} + 1 + \frac{1}{3} \right) \right] \quad (2)$$

where  $t$  is the length of the single internal branch of the species tree measured in  
 generations,  $t_e$  is the length of terminal branch from species  $A$  and  $B$ ,  $N$  is the population



150 size,  $\mu$  is the neutral mutation rate, and  $\sigma_M^2$  is the variance of the mutational effect  
distribution. This last parameter describes the effect of individual mutations, and does not  
correspond to the Brownian motion evolutionary rate (which is instead equivalent to  
 $2N\mu\sigma_M^2$  in equations 2 and 3). Following the same notation, the expected covariances in  
trait values between species are (for a complete derivation, see section 1.2 in the  
155 Supplementary Text):

$$Cov_{Coal}(A, B) = 2N\mu\sigma_M^2 \left[ (1 - e^{-t/2N}) \left( 1 + \left( \frac{t}{2N} - \left( 1 - \frac{t/2N}{e^{t/2N} - 1} \right) \right) \right) + \left( \frac{1}{3} e^{-t/2N} \right) \right] \quad (3)$$

and

$$Cov_{Coal}(A, C) = Cov_{Coal}(B, C) = 2N\mu\sigma_M^2 \left( \frac{1}{3} e^{-t/2N} \right) \quad (4)$$

Note that the covariances between species  $A$  and  $C$  and between  $B$  and  $C$  are the same  
because  $A$  and  $B$  are equally distant to species  $C$ .

160 With the expectations under BM and the coalescent in hand, we can now ask how  
these quantities compare in the simple case of little to no ILS (we use the species tree and  
branch lengths depicted in figure 2a, for which the probability of discordance is very low,  
 $\approx 0.01$ ). It is easy to see that for any  $N > 0$ , the single-species variance under the coalescent  
model will be larger than that expected under BM. For example, even in the extreme case  
165 where  $2N = 1$  (and by setting  $\sigma_M^2$  and  $\mu = 1$ ), we can observe that the variance within any  
of the species under the coalescent is higher ( $Var_{Coal} = 6$ ) than under the BM model ( $Var_{BM}$   
 $= 5$ ). This is a curious, yet not unexpected result: traditional phylogenetic models such as  
BM do not consider the variation that exists in ancestral populations prior to speciation<sup>29</sup>.

Even though gene trees are always concordant with the species tree in this scenario, they  
170 will also always be taller due to the waiting times for coalescence in ancestral populations.

Conversely, expected covariances between species under both models should be exactly equivalent in the absence of genealogical discordance. First, the covariance between species  $A$  and  $C$  should be zero in both cases: these lineages do not share internal branches under either model when there is no ILS. Indeed,  $Cov_{Coal}(A, C)$  and  $Cov_{BM}(A, C)$   
175 both evaluate to 0 in the absence of ILS, as specified by equation 4 and equation 1, respectively. Second, the internal branch subtending species  $A$  and  $B$  is the same length in both models, as the waiting time for coalescence in the ancestral population of  $A$  and  $B$  is exactly the same as the waiting time in the ancestral population of all three species (Fig. 2a). Therefore,  $Cov_{Coal}(A, B)$  and  $Cov_{BM}(A, B)$  both also evaluate to 4 in this scenario.

180 In summary, we can model the distribution of quantitative trait values across species under the coalescent model as a collection of contributions from many individual genealogies that all determine the value of such a trait. However, expected trait values in the coalescent are not exactly the same as those expected under the classical BM model, even in the absence of genealogical discordance and given a fixed phylogeny. While  
185 expected covariances will be identical between models if no genealogical discordance is present, expected variances will still differ; this difference will be accentuated with larger ancestral population sizes. This result will therefore affect any parameters being estimated — such as the evolutionary rate  $\sigma^2$  — that depend on expected species variances. Below, we explore how the expectations under the coalescent and BM models  
190 can further differ in the presence of ILS and discordance.

## **Consequences of genealogical discordance to quantitative traits: the “deep coalescence” effect and hemiplasy**

We can predict from the expectations laid out above that the variances and  
195 covariances under the coalescent model will change in the presence of discordance. In contrast, the BM model will have the same expectations because it does not consider genealogical discordance — the species tree is a fixed parameter. In order to characterize the effects of discordance on variances within species and covariances between species, we considered five different scenarios with increasing percentages of gene tree  
200 discordance (0, 15, 30, 45 and 60% discordance, respectively). We used the three-species phylogeny (Fig. 2a) for its mathematical tractability, and in addition to computing the expectations of these measures (using equations 2-4), we simulated 1,000 data sets under each of the five scenarios. This simulation procedure is illustrated in figure 3, where for each locus underlying a quantitative trait, mutations are thrown down at random along  
205 the genealogy and mutational effects of each mutation are drawn from a distribution determined by  $\sigma_M^2$ . Simulations were repeated for different numbers of loci affecting the trait: 5, 15, 25, 50 and 100. In keeping with the usual practice in comparative analyses of employing a single, static species tree, levels of ILS were increased by multiplying ancestral population sizes by incrementally larger factors — the topology and branch  
210 lengths of the species tree were kept constant (see Methods for details).

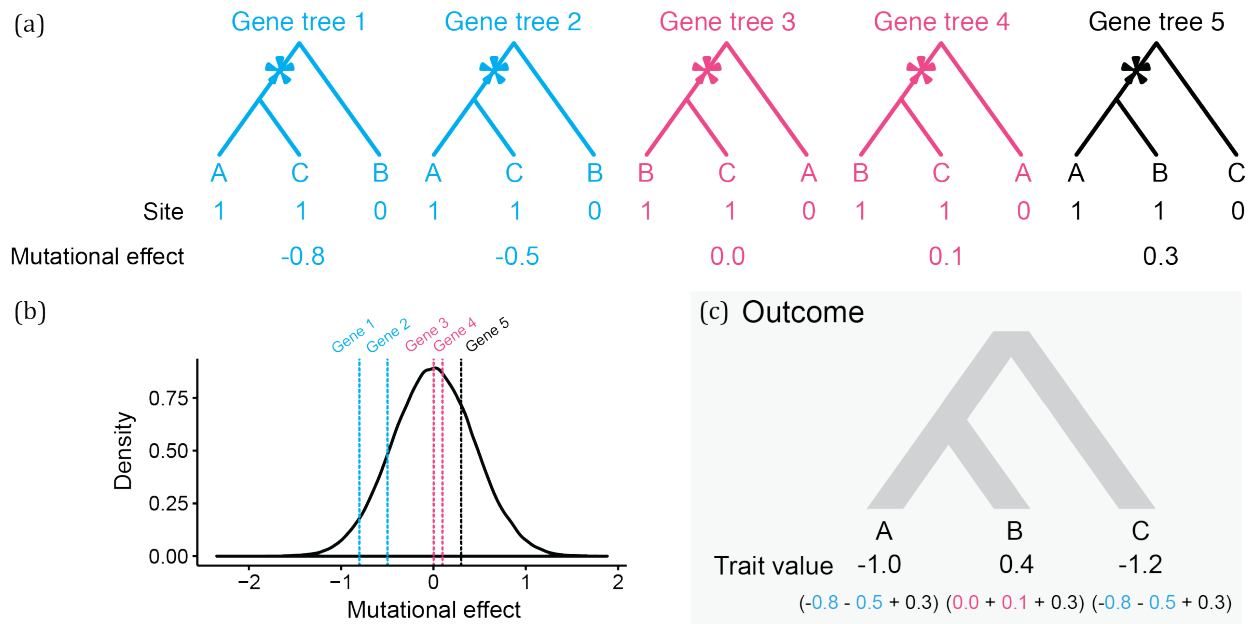

**Figure 3:** A single continuous traits controlled by five loci, four of which have discordant gene trees. (a) Genealogies of the loci controlling the trait. Asterisks represent mutations at a given site in each of the five loci. Ancestral alleles (0) have no effect on the trait value. Derived alleles (1) have their random effects on the trait value drawn from a mutational effect distribution (see (b)). (b) Mutational effect distribution of derived alleles. The distribution has a mean of zero and unit variance. (c) The outcome of a simulation consists of one trait value per species, which correspond to the sum of all derived allele mutational effects coming from all loci controlling the trait.

We observed an overall good match between the observed and expected variances and covariances (Fig. 4 and Fig. 5a). Under the coalescent model, larger ancestral population sizes make coalescent waiting times longer, and result not only in more ILS and more gene tree discordance, but also in taller trees on average. As expected (equations 2-4), data sets simulated with larger  $N$  therefore had higher variances and covariances (Fig. 4a-b). We refer to this phenomenon as the “deep coalescence” (DC) effect. The DC effect occurs due to the increase in average gene tree height, relative to the species tree height, under the coalescent model with large population sizes (cf. 29). We stress that (i) this effect

220 is *not* due to discordance, and (ii) not only variances, but covariances among lineages that  
share a history in the species tree, are affected. The latter happens because, as mentioned  
above, it will take longer for any two lineages to coalesce given a larger population size  
(the parameter  $N$  controls this time in equations 3 and 4). Consequently, the waiting time  
for the last coalescent event (which determines the length of the internal branch) will also  
225 be longer, leading to higher covariances between pairs of descendant species.

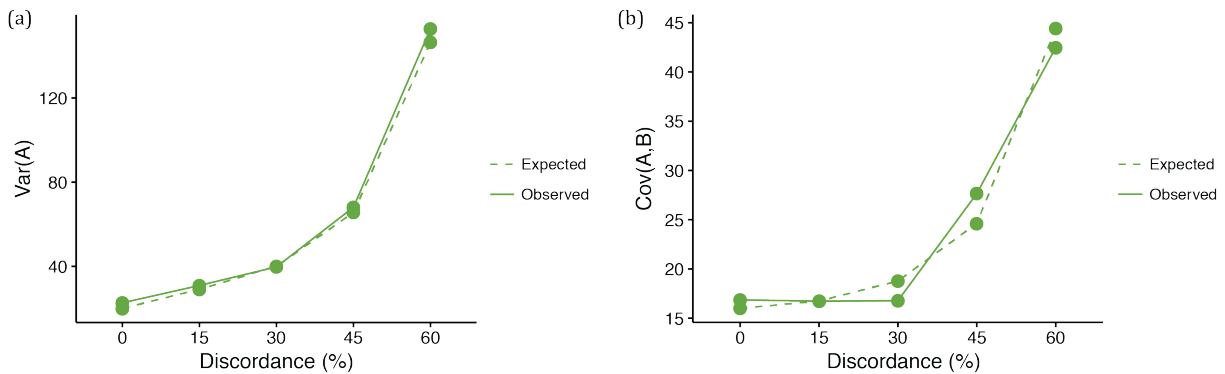

**Figure 4:** (a) Expected and observed variances in trait values of species  $A$  in each of the five ILS conditions. Expected values come from equation 2. (b) Expected and observed covariances between species  $A$  and  $B$  in each of the five ILS conditions. Expected values come from equation 3.

The number of loci did not influence variances and covariances, which is expected. This is because the standard deviations of the mutational effect distributions used in our simulations ( $\sigma_M^2$ ) are scaled to keep trait-value variances constant with changing  
230 numbers of loci, thus ensuring a fair comparison between models with different numbers of loci. This follows the standard logic of the infinitesimal model, i.e., the larger the number of loci controlling a trait, the smaller the effect each mutation should have on the trait value<sup>30</sup>; for more details in the context of the coalescent model, see ref. 25.

Finally, under the coalescent model, gene tree discordance *does* have an effect: the  
235 covariance between species *A* and *C* (and between *B* and *C*) increases with more ILS  
relative to the covariance between species *A* and *B* (Fig. 5a). Recall that when there is no  
discordance there is no covariance between non-sister species, because they do not share  
an evolutionary history. Discordant gene trees offer the opportunity for non-sister species  
to have a shared history, and covariance increases. As a result, there is an increased  
240 similarity between non-sister species in quantitative traits due to hemiplasy in the  
underlying gene trees. Ultimately, the effect of hemiplasy on continuous traits is to make  
covariances between different pairs of species converge on the same value (Fig. 5b). This  
makes intuitive sense, as in the limit all three topologies will be equally frequent, resulting  
in equal covariances between all pairs of species.

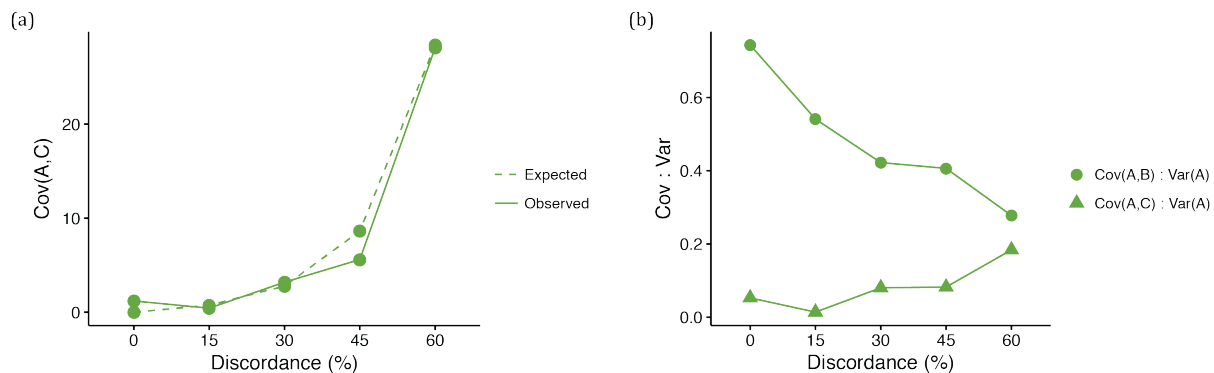

**Figure 5:** (a) Expected and observed covariances between species *A* and *C* in each of the five ILS conditions. Expected values come from equation 4. (b) Observed covariances between a pair of species normalized by the variance in species *A*, for all five ILS conditions.

245

We emphasize that the aforementioned effects were observed despite the fact that the concordant topology was always the most common, and that substitutions on discordant trees and discordant branches occurred in only a fraction of the loci underlying

the continuous trait. Furthermore, the number of loci does not seem to strongly affect our  
250 results, as the difference between covariances were similar regardless of the number of  
loci controlling the trait. This seems to suggest that if hemiplasy poses problems for  
inferences about continuous traits, all traits will be affected, not just those controlled by a  
small number of loci. In the next section we address how hemiplasy affects standard  
phylogenetic comparative methods applied to quantitative traits.

255

### **Hemiplasy increases inferred evolutionary rates and decreases phylogenetic signal**

We first investigated the impact of discordance and hemiplasy on estimates of a  
commonly inferred parameter, the BM evolutionary rate,  $\sigma^2$ . We estimated  $\sigma^2$  from data  
simulated along a five-species asymmetric phylogeny (Fig. 2b). Simulating data for five  
260 species allows for more ILS (and a greater effect of hemiplasy<sup>20</sup>) relative to the three-  
species case, due to the larger number of possible gene tree topologies (105 in the former  
case versus the 3 possible topologies in the latter). Again, we simulated data under five ILS  
conditions with different percentages of gene tree discordance (0, 20, 40, 60 and 80%  
discordant trees, respectively) by keeping the phylogeny constant and increasing  
265 population sizes. As in the three-species case, we simulated continuous traits controlled  
by 5, 15, 25, 50 and 100 loci.

As mentioned above, increasing ancestral population sizes increases both ILS and  
the average height of gene trees with two main resulting patterns: (i) expected  
covariances between non-sister species will increase (due to hemiplasy), and (ii) expected  
270 variances within species will increase (due to deep coalescence). Because BM does not  
model the number, topology, or lengths of the gene trees underlying a continuous trait, we

predicted that both outcomes would be accounted for when inferring rates under the BM model as spuriously higher evolutionary rates. Indeed, we observed a positive correlation between the estimated  $\sigma^2$  (which corresponds to  $2N\mu\sigma_M^2$  in the coalescent model) and ILS (Fig. 6a). This pattern was the same for all data sets, irrespective of the number of loci controlling the trait.

We also reasoned that another major consequence of hemiplasy — resulting from the changes in expected covariances in trait values between pair of species — would be the reduction of the average phylogenetic signal with increasing ILS. This is because the effect of hemiplasy on quantitative traits is to make covariances between more closely related species become smaller relative to covariances between more distantly related species. The more hemiplasy, the less should the covariances resemble values that would be observed for a trait evolving along the species tree, and thus the phylogenetic signal should be lower. We measured the phylogenetic signal in each replicated simulation by estimating a commonly used parameter, Pagel's  $\lambda$  (where  $\lambda = 1$  indicates a trait evolving according to BM along a species tree, and  $\lambda < 1$  indicates lower phylogenetic signal<sup>5,31</sup>). As expected, estimates of  $\lambda$  decreased on average with increasing ILS (Fig. 6b), reflecting the lower phylogenetic signal of traits partly determined by discordant gene trees.

Given the results from Pagel's  $\lambda$ , we attempted to distinguish the contribution of the DC effect (i.e., overall increase in variances and covariances) from that of hemiplasy (i.e., relative change in covariances) to the spurious increase in  $\sigma^2$ . The parameter  $\lambda$  can be thought of as a species tree branch-stretching parameter<sup>3</sup>: we predicted that when estimating  $\sigma^2$  in the presence of  $\lambda$ , the latter would act as a “buffer” parameter absorbing the effect of hemiplasy by becoming reduced itself (as shown in Fig. 6b).



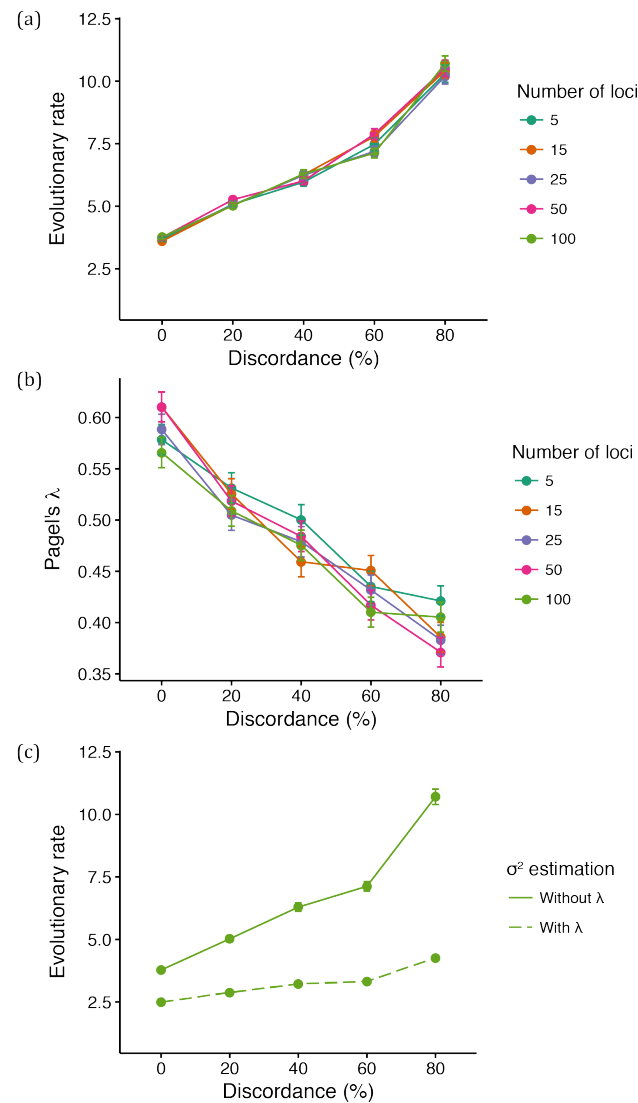

**Figure 6:** (a) Mean evolutionary rate for different number of loci controlling the simulated continuous trait and different levels of discordance. (b) Mean value of Pagel's  $\lambda$  for different number of loci controlling the simulated continuous trait and different levels of discordance. (c) Mean evolutionary rate when 100 loci control the trait ("Without  $\lambda$ " is the same as shown in (a); in "With  $\lambda$ ", the rate was estimated with Pagel's  $\lambda$ ).

295

Indeed, evolutionary rates were much lower when estimated in the presence of  $\lambda$  (Fig. 6c, "With  $\lambda$ "), but still remain higher in data sets simulated with increasing levels of ILS. This is because while  $\lambda$  can absorb the effect of hemiplasy by shrinking internal branches, it

cannot account for the DC effect resulting from the increased average gene tree heights in  
300 higher ILS conditions.

These results suggest that both the DC effect and hemiplasy contribute to the increase in estimates of  $\sigma^2$ . In BM model terms, understanding the impact of the DC effect on higher estimates of  $\sigma^2$  is straightforward: if the tree (reflected in matrix  $\mathbf{T}$ , equation 1) is held constant and all variances and covariances (the entries of  $\mathbf{V}$ , equation 1) become  
305 larger, then  $\sigma^2$  must become larger. But our results also suggest that the effect of hemiplasy is comparable to the DC effect, and possibly of even greater magnitude in the presence of more ILS. This observation is perhaps less intuitive, but indicates that  $\sigma^2$  must become much higher to account for the difference between the observed covariances (i.e., off-diagonal entries of  $\mathbf{V}$ ) and expected covariances, given the observed variances and  $\mathbf{T}$ .

310 Assuming that quantitative traits evolve according to the coalescent model, larger ancestral population sizes and genealogical discordance can thus lead to an overestimation of  $\sigma^2$  and to lower values of  $\lambda$ , and will likely affect comparative methods that make use of such parameters. We point the curious reader to the supplementary text (section 2.3) for a thorough theoretical treatment on how expected trait variances and  
315 covariances under the two models should differ, and why these differences can lead to the reported estimates of  $\sigma^2$  and  $\lambda$ .

### **Hemiplasy can increase the false positive rate in phylogenetic hypothesis testing**

Many studies test the hypothesis that groups of species differ in measured traits  
320 due to factors other than phylogenetic relatedness. We addressed whether hemiplasy could also interfere with this type of phylogenetic hypothesis testing. The comparative

method of choice we used was the phylogenetic ANOVA<sup>32</sup>. As in traditional ANOVA, this method allows the comparison of mean trait values across groups of species. Importantly, the phylogenetic ANOVA also corrects for the inflation of degrees of freedom caused by the  
325 non-independence of data points — which results from the hierarchical nature of the phylogenetic relationships among species<sup>4</sup>. This correction allows the approximation of the true number of degrees of freedom through simulations of trait values along the phylogeny (given some model of trait evolution — BM in our case). The simulations collectively comprise an empirical  $F$  distribution that is then used in hypothesis testing<sup>32</sup>.

330 Our prediction was that increasing levels of ILS and of hemiplasy would increase the false positive rate of phylogenetic ANOVAs. We tested this prediction by conducting phylogenetic ANOVAs on the five-species simulations. Hypothesis testing consisted of comparing the null hypothesis that a pair of species had the same mean trait value as the remaining three species, against the alternative hypothesis of different means. This  
335 procedure was repeated on each of the 1,000 replicates, for all possible groupings of two species versus three species; we then recorded the average number of times per replicate the p-value was significant ( $p < 0.05$ ).

As predicted, we observed a positive correlation between ILS levels and the mean number of times the null hypothesis was rejected in the phylogenetic ANOVA; this trend  
340 was unaffected by the number of loci underlying the trait (Fig. 7). This result suggests that an arbitrary group of species is, on average, more likely to have a spuriously (and significantly) smaller or larger mean trait value than the remaining species in the presence of gene tree discordance.

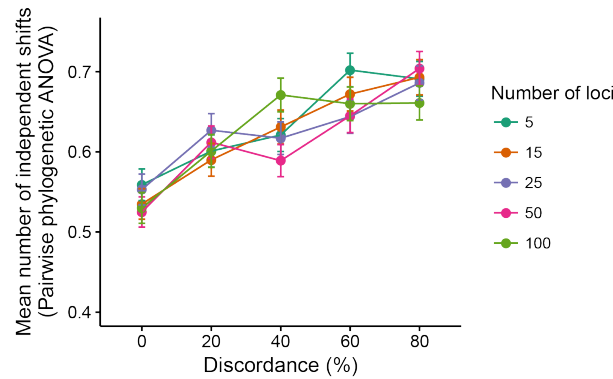

**Figure 7:** Mean number of independent trait-value shifts (i.e., significant phylogenetic ANOVA tests) among all possible groupings of two versus three species.

345           The sharing of similar trait values by non-sister species is an expected byproduct of higher expected covariances among those species when there is gene tree discordance. Such changes in expected covariances between pairs of species trait values are a symptom of hemiplasy (Fig. 5), but not of the DC effect. We thus believe that hemiplasy not only contributes to the incorrect estimation of parameters such as the evolutionary rate, but  
350 can also play a major role in increasing the false positive rate of phylogenetic comparative methods.

### **Threshold traits are strongly affected by hemiplasy**

As demonstrated above, the magnitude of the effect of hemiplasy on phylogenetic  
355 inferences is consistently proportional to the observed levels of gene tree discordance in a data set. Our results also suggest that the number loci underlying a quantitative trait does not matter to the expected trends from such inferences. One remaining question, however, is whether hemiplasy can have an effect on a threshold trait — i.e., a discrete trait that has a continuous character as its liability<sup>26,27</sup>, and if the genetic architecture of such trait is  
360 relevant to this effect.

Addressing this question is straightforward, as we only need to treat our simulated continuous traits as the underlying liability of a threshold character. By choosing an arbitrary threshold of one standard deviation above the mean continuous trait value (over all replicates and all species), we coded all simulated trait values as either “0” (if below the  
365 threshold), or “1” (if above). Defining a threshold using a dispersion measure such as the standard deviation, instead of a fixed value, allows us to account for the higher variances expected in replicates under higher ILS conditions.

Before laying out our predictions for how the effect of hemiplasy on threshold characters should be manifested, we first define a few terms used in the discussion that  
370 follows. A “trait pattern” consists of the threshold character states (from a single replicate) observed at the tips of the tree. Given tree  $((((A,B),C),D),E)$  (the tree we used in the simulations; Fig. 2b), trait pattern “11000” signifies species *A* and *B* sharing state “1” (both had liabilities above the threshold) and species *C*, *D* and *E* sharing state “0” (the three species had liabilities below the threshold). A congruent (informative) trait pattern can be  
375 produced by character-state transitions occurring on internal branches that are present in the species tree; thus trait patterns “11000” and “11100” are congruent. Conversely, an incongruent trait pattern is the result of either homoplastic or hemiplastic evolution: multiple true character-state transitions, or transitions on internal branches of discordant gene trees that are absent from the species tree, respectively. Trait patterns such as  
380 “01100” and “11010”, for example, are incongruent.

If hemiplasy affects threshold traits as it does continuous traits, we predicted that higher ILS levels would lead to a larger number of incongruent trait patterns, and to a lower number of congruent trait patterns. As expected, counts of incongruent informative

385 trait patterns increased with increasing ILS levels (Fig. 8); congruent trait patterns likewise decreased. Furthermore, the same trend was observed from simulations where the liability character was underlain by few or many loci (Fig. 8). This suggests that even in the case of threshold traits, larger numbers of loci comprising the genetic architecture will not mitigate the effect of hemiplasy.

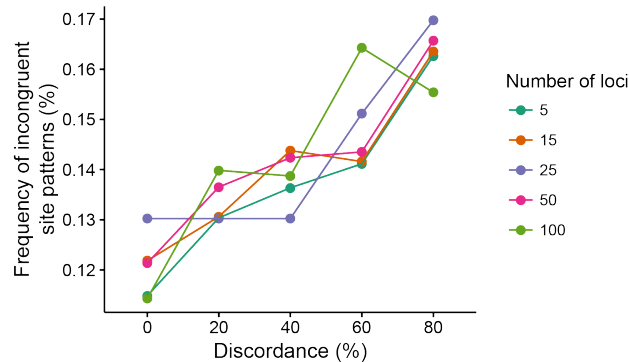

**Figure 8:** Frequency of incongruent trait patterns (out of all informative trait patterns) for threshold traits. Each combination of level of discordance and number of loci was simulated 1,000 times.

390 Incongruent trait patterns are interesting because they can be suggestive of convergent evolution, or of correlated evolution when more than one trait exhibits similar patterns. While we do not further investigate the behavior of phylogenetic comparative methods applicable to discrete characters here, it is clear nonetheless that in the presence of gene tree discordance inferences from incongruent patterns can be misleading about the number of times a trait has evolved. This will be particularly true when the reconstruction of character-state transitions is carried out under maximum parsimony. Furthermore, regardless of whether branch lengths are taken into account, misidentification of the branches along which character states are inferred to change will be more likely in the presence of gene tree discordance. Overall, the more genealogical

395

400 discordance is present in a data set, the more likely it is that a discrete trait will exhibit an incongruent pattern by chance, simply as a result of the stochasticity of the coalescent process.

## Discussion

405 In the present study, we addressed whether genealogical discordance and hemiplasy can affect phylogenetic inferences about quantitative traits. We considered ILS to be the sole cause of gene tree discordance, and used the coalescent to model the evolution of a quantitative trait along a phylogeny. By employing coalescent theory, we demonstrate that in the absence of ILS the coalescent and BM models are equivalent with  
410 respect to the expected covariances between species trait values, but differ in terms of the species expected trait variances. In the presence of ILS, hemiplasy causes the expected covariance in trait values between pairs of more distantly related species to increase.

The increased covariance due to hemiplasy leads to error in estimates of two parameters commonly studied under the BM model, namely, the evolutionary rate,  $\sigma^2$ , and  
415 Pagel's  $\lambda$ . Hemiplasy consistently led to an overestimation of  $\sigma^2$ , and to lower  $\lambda$  estimates. Moreover, errors were also observed when conducting comparative analyses such as the phylogenetic ANOVA, whose false positive rate was increased by greater levels of genealogical discordance and hemiplasy. Finally, by treating quantitative traits as a liability character underlying a threshold trait, we found that hemiplasy affects the  
420 number of times such traits appeared incongruent with the species tree. All of the aforementioned results held irrespective of the number of loci controlling the quantitative trait.

Phylogenetic comparative methods aimed at quantitative traits traditionally  
employ the BM model, which is equivalent to a quantitative genetics model in which many  
425 genes have small effects on a selectively unconstrained character<sup>33,34</sup>; both BM and some  
extensions of it can include certain forms of selection (e.g., the Ornstein-Uhlenbeck model  
35). Nonetheless, these models do not explicitly incorporate the number of loci, their gene  
trees, nor the effects of each locus on a quantitative trait of interest. More importantly,  
because BM models do not explicitly model genealogical discordance they are vulnerable  
430 to hemiplasy, which can lead to inaccurate phylogenetic inferences.

Here we demonstrated that the multispecies coalescent can be used to model  
quantitative traits evolving across a phylogenetic tree. Though not as simple as BM, the  
coalescent includes multiple parameters that can more realistically model biological  
processes. These extra parameters include those whose values we either fixed or varied in  
435 this study, such as the number of loci controlling the trait, mutation rate, distribution of  
mutational effects, and population size. Most importantly, this model can incorporate  
relationships between lineages not found in the species tree by modeling gene tree  
discordance. While we showed that the coalescent can produce accurate expectations of  
phylogenetic variances and covariances — even in the presence of discordance — more  
440 work is necessary to explore the inference of such parameters from data using this model.

The purpose of this study was to test whether phylogenetic inferences might be  
misled by gene tree discordance and hemiplasy for traits with complex genetic  
architectures, much as similar analyses of simple discrete traits are<sup>6</sup>. We found that  
discordance strongly affects phylogenetic methods, and believe that the results from our  
445 simple simulations are likely to be conservative. This is because we assumed only



additivity of mutations and a Gaussian mutational effect distribution. The presence of dominance, epistasis, and broader or skewed mutational effect distributions are likely to compound the effects of hemiplasy.

Moreover, while our assessment of phylogenetic methods is by no means  
450 exhaustive, it is unlikely that the trends we report here are exclusive to the approaches we investigated. Methods that compare models with one versus multiple evolutionary rates across a tree<sup>36</sup>, or that estimate branch lengths from quantitative traits<sup>28</sup>, for example, could be affected by hemiplasy in the same way that nucleotide substitution models are<sup>20</sup>. Similarly, methods addressing the correlation between discrete traits (e.g., ref<sup>37</sup>) could  
455 also have increased false positive rates if hemiplasy acts on multiple traits in similar ways. Hemiplasy is also expected to broaden the confidence intervals around ancestral state reconstructions of quantitative traits<sup>38</sup>, making it harder to infer significant shifts in trait means and to place such shifts on internal branches of the species tree. While recently proposed methods that study BM models over species networks do represent a step  
460 forward in the presence of discordance due to hybridization and introgression (e.g., refs. 39,40), these methods do not account for either deep coalescence or the full spectrum of genealogical discordance.

Given our results, it is reasonable to ask whether and when traditional phylogenetic comparative methods for quantitative traits are appropriate. ILS is expected  
465 to act when there are short internode distances in a species tree, regardless of how far in the past the rapid succession of speciation events has occurred. This implies that the effects of hemiplasy will be greatest for species radiations, as these are defined as periods of rapid speciation<sup>41</sup>. Conversely, many phylogenetic studies include species trees without

much discordance, either because none has occurred or because taxa have been chosen to  
470 minimize discordance. This latter approach — thinning species from analyses in order to  
minimize or remove discordance — can improve the accuracy of inferences about  
molecular changes<sup>20</sup>. We have also purposely considered small trees where every lineage  
is involved in ILS; the set of internal nodes in such clades have been collectively referred  
to as “knots”<sup>23,42</sup>. The fewer and the “looser” the knots in larger trees (i.e., the longer the  
475 internal branches), the safer it should be to use BM-based methods. It may also be useful  
simply to conduct a *post hoc* examination of the lineages evolving most rapidly or the  
lineages involved in convergence when carrying out traditional analyses: if these coincide  
with knots in a larger tree, this may provide evidence of spurious results.

Good models are able to strike a balance between biological realism and  
480 tractability. While the coalescent model has the potential of being more realistic than the  
family of models based on BM, the inferential machinery for the coalescent is less well-  
developed. It is thus still unclear how tractable the coalescent model would be in terms of  
phylogenetic inference. On the other hand, numerous comparative methods making use of  
BM’s simplicity and tractability (e.g., the existence of analytical solutions for maximizing  
485 the likelihood of parameters of interest) have been developed, implemented, and tested  
over the years, and so we do not expect a complete shift away from such methods in the  
near future. Indeed, we have shown how including Pagel’s  $\lambda$  in analyses aimed at  
estimating evolutionary rates under the BM model can make inferences more accurate,  
even in the presence of hemiplasy. Moving forward, we nonetheless believe it worthwhile  
490 to further develop and explore models with the potential of being more realistic and more

robust to problems such as those described here. At the least, phylogenetic analyses using the BM model on trees with underlying discordance must be examined carefully.

## Methods

### 495 *Simulations under the multi-species coalescent model for quantitative traits*

In order to simulate a quantitative trait evolving along a species tree, we extended the population model put forward in ref. <sup>25</sup> into a phylogenetic model (Fig. 3), and modified the tools made available by these authors accordingly. As in traditional phylogenetic models, the trait value simulated for a species was treated as the mean of its populations<sup>34</sup>.

500 Each species trait value corresponded to the sum of the effects of derived alleles (ancestral alleles had no effect on trait values) at variant sites from all loci controlling the trait. The effect of each derived allele was drawn from a normal mutational effect distribution with mean zero and standard deviation scaled by the number of loci underlying the trait (e.g., Fig. 3b).

505 Simulations were conducted with the coalescent simulator *ms*<sup>43</sup> along species trees  $((A:1,B:1):4,C:5)$  and  $((((A:1,B:1):4,C:5):4,D:9):4,E:13)$ . We simulated traits underlain by varying numbers of loci (5, 15, 25, 50 and 100), each under five ILS conditions with increasing amounts of gene tree discordance (1,000 replicates per condition). Gene tree discordance was introduced by simulating larger ancestral populations; we did so by  
510 multiplying the size of these populations by an increasingly larger factor while keeping species tree branch lengths constant. In the three-species phylogeny case, the five ILS conditions differed by increments of 15% in gene tree discordance (where  $N$  was multiplied by factors of 1, 5.2, 9.6, 19.5 and 50), with the lowest and highest ILS conditions

exhibiting 0% and 60% discordance, respectively. In the five-species phylogeny case,  
515 increments in gene tree discordance were of 20% (factors were 1, 3.6, 5.6, 8 and 14), with  
0% and 80% of gene trees being discordant in the lowest and highest ILS condition,  
respectively. We fixed  $\theta = 4$  in all simulations.

### ***Parameter estimation and hypothesis testing under Brownian motion***

520 Parameter estimation was carried out for each of the 5,000 replicated simulations  
along the five-species phylogeny (1,000 per ILS condition). We estimated the evolutionary  
rate,  $\sigma^2$ , and  $\lambda$  parameters with the “fitContinuous” function of R’s *geiger* package<sup>44</sup>. We  
further inferred  $\sigma^2$  in the presence of  $\lambda$  (“With  $\lambda$ ” in Fig. 6c) using the same function in  
*geiger*.

525 Phylogenetic ANOVA was also conducted on all simulations from the five-species  
phylogeny to test the hypothesis that a pair of species shared the same mean trait value,  
while the other three species had a different mean. We performed one test for each  
possible pair of species (versus the remaining three species), and repeated these tests for  
each replicated simulation under all ILS conditions. We then counted for each replicate  
530 how many of these tests yielded a significant p-value ( $p < 0.05$ ). Again, phylogenetic  
ANOVA was carried out with the *geiger* package.

### **Discretization of quantitative trait values using the threshold model**

In order to characterize the effect of hemiplasy on threshold traits, we treated the  
535 quantitative trait simulated with the five-species phylogeny as a continuous liability<sup>26,27</sup>.  
Each species liability value was then compared to a threshold to generate the species’

corresponding trait value: “0” if below the threshold, and “1” if above. Exact threshold values were adjusted between ILS conditions to account for the fact that data sets with more gene tree discordance should have greater expected variances in liability values. We set the threshold of a given ILS condition to the value at one standard deviation above the mean of the liability value distribution (from all species and all replicates) for that ILS condition. ILS conditions with more gene tree discordance thus had higher threshold values. We then tabulated all different informative trait patterns in which two species shared state “1”, and the remaining three species shared state “0”, and classified them as either congruent or incongruent (see main text).

### **Author contributions**

F.K.M. and M.W.H. designed the study. F.K.M, J.G.S., and J.A.F.-G. conducted analyses. F.K.M. and M.W.H. wrote the manuscript.

### **Acknowledgements**

F.K.M. and M.W.H. were supported by National Science Foundation grant DBI-1564611. J.G.S. was supported by National Institutes of Health grant R35 GM124745.

### **References**

1. Harvey, P. H. & Pagel, M. D. *The comparative method in evolutionary biology*. (Oxford University Press, 1991).
2. Garamszegi, L. Z. *Modern phylogenetic comparative methods and their application in evolutionary biology*. (Springer, 2014).
3. O’Meara, B. C. Evolutionary inferences from phylogenies: A review of methods. *Annual Review of Ecology, Evolution, and Systematics* **43**, 267–285 (2012).
4. Felsenstein, J. Phylogenies and the comparative method. *The American Naturalist* **125**, 1–15 (1985).

- 565 5. Pagel, M. D. Inferring the historical patterns of biological evolution. *Nature* **401**, 877–884 (1999).
6. Hahn, M. W. & Nakhleh, L. Irrational exuberance for resolved species trees. *Evolution* **70**, 7–17 (2016).
7. Pollard, D. A., Iyer, V. N., Moses, A. M. & Eisen, M. B. Widespread discordance of gene trees with species tree in *Drosophila*: evidence for incomplete lineage sorting. *PLoS Genetics* **2**, 1634–47 (2006).
- 570 8. Hobolth, A., Dutheil, J. Y., Hawks, J., Schierup, M. H. & Mailund, T. Incomplete lineage sorting patterns among human, chimpanzee, and orangutan suggest recent orangutan speciation and widespread selection. *Genome Research* **21**, 349–356 (2011).
- 575 9. Brawand, D. *et al.* The genomic substrate for adaptive radiation in African cichlid fish. *Nature* **513**, 375–81 (2014).
10. Zhang, G. *et al.* Comparative genomics reveals insights into avian genome evolution and adaptation. *Science* **346**, 1311–20 (2014).
11. Suh, A., Smeds, L. & Ellegren, H. The dynamics of incomplete lineage sorting across the ancient adaptive radiation of neoavian birds. *PLoS Biology* **13**, e1002224 (2015).
- 580 12. Pease, J. B., Haak, D. C., Hahn, M. W. & Moyle, L. C. Phylogenomics reveals three sources of adaptive variation during a rapid radiation. *PLoS Biology* **14**, e1002379 (2016).
13. White, M. A., Ané, C., Dewey, C. N., Larget, B. R. & Payseur, B. A. Fine-scale phylogenetic discordance across the house mouse genome. *PLoS Genetics* **5**, e1000729 (2009).
- 585 14. Maddison, W. P. Gene trees in species trees. *Systematic Biology* **46**, 523–36 (1997).
15. Hudson, R. R. Testing the constant-rate neutral allele model with protein sequence data. *Evolution* **37**, 203–217 (1983).
- 590 16. Tajima, F. Evolutionary relationship of DNA sequences in finite populations. *Genetics* **105**, 437–460 (1983).
17. Pamilo, P. & Nei, M. Relationships between gene trees and species trees. *Molecular Biology and Evolution* **5**, 568–83 (1988).
18. Edwards, S. V. Is a new and general theory of molecular systematics emerging? 595 *Evolution* **63**, 1–19 (2009).
19. Avise, J. C. & Robinson, T. J. Hemiplasy: a new term in the lexicon of phylogenetics. *Systematic Biology* **57**, 503–7 (2008).
20. Mendes, F. K. & Hahn, M. W. Gene tree discordance causes apparent substitution rate variation. *Systematic Biology* **65**, 711–721 (2016).
- 600 21. Mendes, F. K., Hahn, Y. & Hahn, M. W. Gene tree discordance can generate patterns of diminishing convergence over time. *Molecular Biology and Evolution* **33**, 3299–3307 (2016).
22. Copetti, D. *et al.* Extensive gene tree discordance and hemiplasy shaped the genomes of North American columnar cacti. *Proceedings of the National Academy of Sciences* 605 **114**, 12003–12008 (2017).
23. Mendes, F. K. & Hahn, M. W. Why concatenation fails near the anomaly zone. *Systematic Biology* **67**, 158–169 (2018).
24. Degnan, J. & Rosenberg, N. Discordance of species trees with their most likely gene trees. *PLoS Genetics* **2**, 0762–68 (2006).

- 610 25. Schraiber, J. G. & Landis, M. J. Sensitivity of quantitative traits to mutational effects  
and number of loci. *Theoretical Population Biology* **102**, 85–93 (2015).
26. Wright, S. An analysis of variability in the number of digits in an inbred strain of  
guinea pigs. *Genetics* **19**, 506–536 (1934).
27. Felsenstein, J. Using the quantitative genetic threshold model for inferences between  
615 and within species. *Philosophical Transactions of the Royal Society B: Biological  
Sciences* **360**, 1427–1434 (2005).
28. Felsenstein, J. Maximum-likelihood estimation of evolutionary trees from continuous  
characters. *American Journal of Human Genetics* **25**, 471–492 (1973).
29. Gillespie, J. & Langley, C. Are evolutionary rates really variable? *Journal of Molecular  
620 Evolution* **13**, 27–34 (1979).
30. Fisher, R. A. The correlation between relatives on the supposition of mendelian  
inheritance. *Transactions of the Royal Society of Edinburgh* **52**, 399–433 (1918).
31. Freckleton, R. P., Harvey, P. H. & Pagel, M. Phylogenetic analysis and comparative  
data: a test and review of evidence. *The American Naturalist* **160**, 712–726 (2002).
- 625 32. Garland, T., Dickerman, A. W., Janis, C. M. & Jones, J. A. Phylogenetic analysis of  
covariance by computer simulation. *Systematic Biology* **42**, 265–292 (1993).
33. Lande, R. Natural selection and random genetic drift in phenotypic evolution.  
*Evolution* **30**, 314–334 (1976).
34. Harmon, L. J. Phylogenetic comparative methods: learning from trees (Retrieved  
630 from: <https://lukejharmon.github.io/pcm/>, 2017).
35. Butler, M. A. & King, A. A. Phylogenetic comparative analysis: a modeling approach  
for adaptive evolution. *The American Naturalist* **164**, 683–695 (2004).
36. O’Meara, B. C., Ané, C., Sanderson, M. J. & Wainwright, P. C. Testing for different rates  
of continuous trait evolution using likelihood. *Evolution* **60**, 922–933 (2006).
- 635 37. Pagel, M. D. Detecting correlated evolution on phylogenies: a general method for the  
comparative analysis of discrete characters. *Proceedings of the Royal Society B:  
Biological Sciences* **255**, 37–45 (1994).
38. Martins, E. P. & Hansen, T. F. Phylogenies and the comparative method: a general  
approach to incorporating phylogenetic information into the analysis of interspecific  
640 data. *The American Naturalist* **149**, 646–667 (1997).
39. Bastide, P., Solís-Lemus, C., Kriebel, R., Sparks, K. W. & Ané, C. Phylogenetic  
comparative methods on phylogenetic networks with reticulations. *bioRxiv 194050*  
(2017).
- 645 40. Jhwueng, D.-C. & O’Meara, B. Trait evolution on phylogenetic networks. *bioRxiv*  
*0239986* (2015).
41. Schluter, D., Price, T., Mooers, A. & Ludwig, D. Likelihood of ancestor states in  
adaptive radiation. *Evolution* **51**, 1699–1711 (1997).
42. Ané, C., Larget, B., Baum, D. A., Smith, S. D. & Rokas, A. Bayesian estimation of  
concordance among gene trees. *Molecular Biology and Evolution* **24**, 412–426 (2007).
- 650 43. Hudson, R. R. Generating samples under a Wright-Fisher neutral model.  
*Bioinformatics* **18**, 337–338 (2002).
44. Harmon, L. J., Weir, J. T., Brock, C. D., Glor, R. E. & Challenger, W. GEIGER:  
investigating evolutionary radiations. *Bioinformatics* **24**, 129–131 (2008).

655

Version dated: March 4, 2018

QUANTITATIVE TRAITS UNDER GENEALOGICAL DISCORDANCE

**Evolutionary inferences about quantitative traits are affected by underlying genealogical discordance**

FÁBIO K. MENDES<sup>1\*</sup>, JESUALDO A. FUENTES-GONZÁLES<sup>1,2</sup>, JOSHUA G.

SCHRAIBER<sup>3,4,5</sup>, AND MATTHEW W. HAHN<sup>1,6</sup>

<sup>1</sup>*Department of Biology, Indiana University, Bloomington, IN, 47405, USA;* <sup>2</sup>*School of Life Sciences, Arizona State University, Tempe, AZ, 85287, USA;* <sup>3</sup>*Department of Biology, Temple University, Philadelphia, PA, 19122, USA;* <sup>4</sup>*Center for Computational Genetics and Genomics, Temple University, Philadelphia, PA, 19122, USA;* <sup>5</sup>*Institute for Genomics and Evolutionary Medicine, Temple University, Philadelphia, PA, 19122, USA;* <sup>6</sup>*Department of Computer Science, Indiana University, Bloomington, IN, 47405, USA*

\*E-mail: fkmendes@indiana.edu.



## SUPPLEMENTARY TEXT

# 1 Deriving expected variances and covariances in quantitative trait values under the coalescent model

## 1.1 Variance in the three species case

Given a three-species phylogeny  $\mathcal{S}$ , the variance in values of trait  $X$  within a diploid species  $i$  is defined as:

$$\text{Var}(X_i) = 2N\mu\sigma_M^2 \times B_{\text{root},i}, \quad (\text{S.1})$$

where  $N$  is the constant population size along the phylogeny,  $\mu$  the mutation rate, and  $\sigma_M^2$  the variance of the mutational distribution. (Note that  $\sigma_M^2$  is not the Brownian motion evolutionary rate,  $\sigma^2$ , which is instead equivalent to  $\mu\sigma_M^2$ .)  $B_{\text{root},i}$  is the expected total length of all branch paths from the root to species  $i$  coming from all *gene trees* generated by  $\mathcal{S}$ .

We can further expand  $B_{\text{root},i}$  as:

$$B_{\text{root},i} = t_e + \left(1 - e^{-t/2N}\right) \left(\frac{t}{2N} + 1\right) + \left(e^{-t/2N}\right) \left(\frac{t}{2N} + 1 + \frac{1}{3}\right), \quad (\text{S.2})$$

where  $t$  and  $t_e$  are internal and terminal branch lengths from  $\mathcal{S}$  in generations,  $1 - e^{-t/2N}$  is the probability that the sister lineages coalesce in their ancestor (i.e., a concordant gene tree is observed), and  $e^{-t/2N}$  the probability that they do not (i.e., the three lineages enter their MRCA and then a concordant or discordant gene tree can be observed). These probabilities then multiply the contributions of their corresponding gene trees to the total path length. Concordant gene trees whose lineages sort in their immediate ancestor

contribute a path length of  $t_e + \frac{t}{2N} + 1$ , while all other trees (concordant or discordant) contribute  $t_e + \frac{t}{2N} + 1 + \frac{1}{3}$ .

We can now arrive at equation 2 from the main text:

$$\mathbb{E}(\text{Var}(X_i)) = 2N\mu\sigma_M^2 \left[ t_e + \left(1 - e^{-t/2N}\right) \left(\frac{t}{2N} + 1\right) + \left(e^{-t/2N}\right) \left(\frac{t}{2N} + 1 + \frac{1}{3}\right) \right]. \quad (\text{S.3})$$

## 1.2 Covariances in the three species case

Following the same notation, the covariance between trait values of species  $i$  and  $j$  is:

$$\text{Cov}(X_i, X_j) = 2N\mu\sigma_M^2 \times B_{\text{root,MRCA}(i,j)}, \quad (\text{S.4})$$

where  $B_{\text{root,MRCA}(i,j)}$  is the expected total length of all gene tree branch paths from the root to the most recent common ancestor of species  $i$  and  $j$ .

Given  $\mathcal{S} = ((A,B),C)$ , and if we let  $i = A$  and  $j = B$ , we can expand  $B_{\text{root,MRCA}(i,j)}$  into:

$$B_{\text{root,MRCA}(A,B)} = \left(1 - e^{-t/2N}\right) \left(1 + \left(\frac{t}{2N} - \left(1 - \frac{t/2N}{e^{t/2N} - 1}\right)\right)\right) + \left(\frac{1}{3}e^{-t/2N} \times 1\right), \quad (\text{S.5})$$

where term  $e^{-t/2N}$  is multiplied by  $\frac{1}{3}$  because species A and B are sister taxa in only one of the three possible equiprobable topologies. Again, concordant gene trees in which the A and B lineages coalesce in their most recent common ancestor occur at frequency  $1 - e^{-t/2N}$ , but we must now subtract the waiting time for their coalescence from their branch length contribution to  $B_{\text{root,MRCA}(A,B)}$ . This waiting time is given by  $1 - \frac{t/2N}{e^{t/2N} - 1}$  and has been derived elsewhere (Mendes and Hahn, 2018). Note that concordant gene trees in which both coalescent events happen in the MRCA of the three species contribute to

$B_{\text{root,MRCA}_{(A,B)}}$  with a branch that is  $2N$  generations long (the expected time to coalescence of two lineages), so  $\frac{1}{3}e^{-t/2N}$  is multiplied by  $2N \times \frac{t}{2N} = 1$ .

We now arrive at equation 3 from the main text:

$$\mathbb{E}(\text{Cov}(X_A, X_B)) = 2N\mu\sigma_M^2 \left[ \left(1 - e^{-t/2N}\right) \left(1 + \left(\frac{t}{2N} - \left(1 - \frac{t/2N}{e^{t/2N} - 1}\right)\right)\right) + \left(\frac{1}{3}e^{-t/2N}\right) \right]. \quad (\text{S.6})$$

Finally, if we let  $i = A$  (or  $i = B$ ) and  $j = C$ ,  $B_{\text{root,MRCA}_{(i,j)}}$  is defined as:

$$B_{\text{root,MRCA}_{(A,C)}} = B_{\text{root,MRCA}_{(B,C)}} = \frac{1}{3}e^{-t/2N} \times 1. \quad (\text{S.7})$$

As in equation S.5, each discordant gene tree contributes with a branch that is  $2N$  generations long, and so its probability  $\frac{1}{3}e^{-t/2N}$  is multiplied by  $2N \times \frac{1}{2N} = 1$ . From this equation, we can then derive equation 4 from the main text:

$$\mathbb{E}(\text{Cov}(X_A, X_C)) = \mathbb{E}(\text{Cov}(X_B, X_C)) = 2N\mu\sigma_M^2 \left(\frac{1}{3}e^{-t/2N}\right). \quad (\text{S.8})$$

## 2 An alternative derivation for variances and covariances in quantitative traits, with further considerations

As in the previous sections, we embed our derivations in a phylogenetic context by assuming that we have  $n$  tips in a species tree and exactly one sample per species. For the sake of simplicity in terms of notation, we measure branch lengths in generations instead of units of  $2N$  generations (as above and in the main text); this accounts for missing factors of  $2N$  in all equations below relative to equations in the main text and above. Given a

trait controlled by  $L$  independent loci, and letting  $X_{i,l}$  be the contribution of locus  $l$  to  $X_i$  (the value of trait  $X$  in species  $i$ ) we assume an additive model, i.e. that

$$X_i = \sum_{l=1}^L X_{i,l}. \quad (\text{S.9})$$

Because the loci are independent and identically distributed, the variance and covariance of the trait can be computed by summing over loci,

$$\begin{aligned} \text{Var}(X_i) &= \sum_{l=1}^L \text{Var}(X_{i,l}) \\ &= L\text{Var}(X_{i,l}) \end{aligned} \quad (\text{S.10})$$

and

$$\begin{aligned} \text{Cov}(X_i, X_j) &= \sum_{l=1}^L \sum_{k=1}^L \text{Cov}(X_{i,l}, X_{j,k}) \\ &= \sum_{l=1}^L \text{Cov}(X_{i,l}, X_{j,l}) \\ &= L\text{Cov}(X_{i,l}, X_{j,l}) \end{aligned} \quad (\text{S.11})$$

where the second line follows because  $\text{Cov}(X_{i,l}, X_{j,k}) = 0$  if  $k \neq l$  by assumption that the loci are independent.

## 2.1 The variance of a single sample from a species

Consider the contribution of a single locus to the trait  $X$  in species  $i$ . We proceed by first computing the variance of this measurement by conditioning on the random genealogy underlying that locus, and then average over all possible genealogies at the locus. In this context, the only thing that matters is the overall height of the genealogy. Given

the genealogy at the locus,  $\mathcal{G}_l$ , we have:

$$\text{Var}(X_{i,l}|\mathcal{G}_l) = \mu\sigma_M^2 T_{\text{MRCA},l} \quad (\text{S.12})$$

where  $T_{\text{MRCA},l}$  is the (random) *coalescence* time of the most recent common ancestor (MRCA) at this locus. Note that  $T_{\text{MRCA},l}$  occurs in the ancestral population of all species (see Fig. S.1 for an example of the three species case).

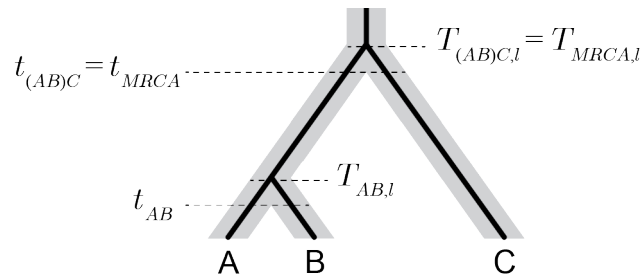

Figure S.1: Divergence times,  $t_{ij}$  ( $t_{AB}$ ,  $t_{(AB)C}$  and  $t_{\text{MRCA}}$  for the species tree depicted in gray), and coalescence times,  $T_{ij,l}$  ( $T_{AB,l}$ ,  $T_{(AB)C,l}$  and  $T_{\text{MRCA},l}$  for genealogy  $l$  depicted in black).

Let  $p_k$  be the probability that  $k$  lineages enter the population of the MRCA of *all* species. (Note that for the three-species phylogeny,  $p_2 = (1 - e^{-t/2N})$  and  $p_3 = e^{-t/2N}$ , which are defined in equations S.3 and S.6.)

Then, we use the law of total variance to get:

$$\begin{aligned} \text{Var}(X_{i,l}) &= \mathbb{E}(\text{Var}(X_{i,l}|\mathcal{G}_l)) + \text{Var}(\mathbb{E}(X_{i,l}|\mathcal{G}_l)) \\ &= \mathbb{E}(\text{Var}(X_{i,l}|\mathcal{G}_l)) \\ &= \mathbb{E}(\mu\sigma_M^2 T_{\text{MRCA},l}) \\ &= \mu\sigma_M^2 \left( t_{\text{MRCA}} + 4N \sum_{k=2}^n \left(1 - \frac{1}{k}\right) p_k \right) \\ &= \mu\sigma_M^2 \left( t_{\text{MRCA}} + 4N - 2N \sum_{k=2}^n \frac{2}{k} p_k \right) \end{aligned} \quad (\text{S.13})$$

where  $t_{\text{MRCA}}$  is the time to the root of the species tree (Fig. S.1). The second line follows

because we set the ancestral value to 0 and have no directionality to the mutational effects. In the fourth line, the total height of the genealogy,  $T_{\text{MRCA},l}$ , is expressed as the time to the root of the species tree,  $t_{\text{MRCA}}$ , plus the expected height of a genealogy whose  $k$  lineages enter the MRCA of all species,  $4N \sum_{k=2}^n \left(1 - \frac{1}{k}\right) p_k$ . The second term of this sum follows because  $4N(1 - 1/k)$  is the expected time to the MRCA for a sample of size  $k$  from a population of size  $2N$  (and we sum over all possible probabilities  $p_k$  that  $k$  lineages enter the population of the MRCA of all species).

Computing  $p_k$  can be done through a dynamic programming algorithm, and it depends only on the overall species tree, i.e., it is not specific to any taxon.

Finally, we use this in the formula for the total variance of trait  $X$  to get:

$$\text{Var}(X_i) = L\mu\sigma_M^2 \left( t_{\text{MRCA}} + 4N - 2N \sum_{k=2}^n \frac{2}{k} p_k \right). \quad (\text{S.14})$$

Given the same phylogeny, equation S.14 and equation S.3 evaluate to the same result.

## 2.2 The covariance between samples from two species

Now consider the covariance between a single sample from each of the two species. Again, we first condition on the genealogy underlying locus  $l$ ,  $\mathcal{G}_l$ , and then average over it to find the contribution to the variance. We have:

$$\text{Cov}(X_{i,l}, X_{j,l} | \mathcal{G}_l) = \mu\sigma_M^2 (T_{\text{MRCA},l} - T_{ij,l}), \quad (\text{S.15})$$

where  $T_{ij,l}$  is the *coalescence* time of the common ancestor of the lineages from species  $i$  and the sample from species  $j$  (e.g.,  $T_{AB,l}$  in figure S.1). We again denote by  $p_k$  the probability that  $k$  lineages enter the population of the MRCA of *all species*. We then use the law of total covariance to get:

$$\begin{aligned}
\text{Cov}(X_{i,l}, X_{j,l}) &= \mathbb{E}(\text{Cov}(X_{i,l}, X_{j,l} | \mathcal{G}_l)) + \text{Cov}(\mathbb{E}(X_{i,l}), \mathbb{E}(X_{j,l})) \\
&= \mathbb{E}(\text{Cov}(X_{i,l}, X_{j,l} | \mathcal{G}_l)) \\
&= \mu\sigma_M^2 \mathbb{E}(T_{\text{MRCA},l} - T_{ij,l}) \\
&= \mu\sigma_M^2 \left[ \left( t_{\text{MRCA}} + \sum_{k=2}^n 4N \left( 1 - \frac{1}{k} \right) p_k \right) - (t_{ij} + 2N) \right] \\
&= \mu\sigma_M^2 \left( t_{\text{MRCA}} - t_{ij} + 2N - 2N \sum_{k=2}^n \frac{2}{k} p_k \right)
\end{aligned} \tag{S.16}$$

with  $t_{ij}$  being the time of divergence between species  $i$  and  $j$  (e.g.,  $t_{AB}$  in figure S.1). The fourth line follows from replacing  $T_{\text{MRCA},l}$  and  $T_{ij,l}$  with their expectations.

Once again, we can substitute the last line into the formula for the total covariance to get:

$$\text{Cov}(X_i, X_j) = L\mu\sigma_M^2 \left( t_{\text{MRCA}} - t_{ij} + 2N - 2N \sum_{k=2}^n \frac{2}{k} p_k \right). \tag{S.17}$$

Note that in equation S.16 (and S.17), we compute the trait covariance between any pair of species (for any species tree) without enumerating the individual contributions and probabilities of each and all possible genealogies under the species tree. This is possible because all genealogies having coalescences before  $t_{\text{MRCA}}$  are jointly (and implicitly) dealt with by the recursive computation of  $p_k$ , which we do not lay out here for the sake of brevity.

Finally, given phylogeny ((A,B),C), and letting species  $i = A$ , equation S.17 evaluates to the same results as equations S.6 and S.7 for  $j = B$  and  $j = C$ , respectively.

## 2.3 A comparison of the covariance structure under the Brownian motion and coalescent models

Now, let us examine how the covariance structure derived above relates to the covariance that is usually assumed under a Brownian motion (BM) model of trait evolution. We first show that the variance-covariance matrix under the coalescent model can be represented in terms of the Brownian variance-covariance matrix. We then provide bounds that reveal important properties of the impact of incomplete lineage sorting (ILS). Finally, we explore the asymptotic behavior of the variance-covariance matrix when one approaches no internal coalescences, that is, when all coalescences occur in the MRCA of all lineages.

Let  $L\mu\sigma_M^2 = \sigma^2$  ( $\sigma^2$  is the evolutionary rate in the BM model), to see that  $L\mu\sigma_M^2 t_{\text{MRCA}} = \sigma^2 t_{\text{MRCA}}$  is the variance of a single species under BM with rate  $\sigma^2$ , and that  $L\mu\sigma_M^2 (t_{\text{MRCA}} - t_{ij}) = \sigma^2 (t_{\text{MRCA}} - t_{ij})$  is the covariance between two species under BM with rate  $\sigma^2$ . This shows that there is a component of the covariance that is identical to a Brownian model, assuming rate  $\sigma^2$ . We can then combine our results from the previous two sections to see that the  $ij$ th entry of the variance-covariance matrix under the coalescent model is:

$$\Sigma_{ij} = \Sigma_{ij}^{(BM)} + \left( 2N(1 + \delta_{ij})L\mu\sigma_M^2 - 2NL\mu\sigma_M^2 \sum_{k=2}^n \frac{2}{k} p_k \right), \quad (\text{S.18})$$

where  $\Sigma_{ij}^{(BM)}$  is the covariance under Brownian motion, and  $\delta_{ij}$  is Kronecker's delta. Term  $(2N(1 + \delta_{ij})L\mu\sigma_M^2 - 2NL\mu\sigma_M^2 \sum_k \frac{2}{k} p_k)$  is the contribution of ILS relative to  $\Sigma_{ij}^{(BM)}$ , which affects all entries of  $\Sigma_{ij}$  *equally*. Interestingly, in this derivation no term indicating which trees contribute to each  $\Sigma_{ij}$  entry (or how likely these trees are) is necessary.



### 2.3.1 The covariance structure of the BM and coalescent models in the limiting cases of no ILS vs. maximum ILS

What can be determined about the limiting cases of (i) all sister lineages sorting in their MRCA (no ILS), and (ii) all coalescent events occurring in the MRCA of all taxa (maximum ILS)?

First, note that  $\sum_{k=2}^n \frac{2}{k} p_k = \mathbb{E}\left(\frac{2}{K}\right)$ , where  $K$  is the random number of lineages that enter the MRCA population. Letting  $\mathbb{E}(K)$  be the expected number of lineages that enter the most recent common ancestor population, Jensen's inequality shows that:

$$\begin{aligned} \mathbb{E}\left(\frac{2}{K}\right) &\geq \frac{2}{\mathbb{E}(K)} \\ &\geq \frac{2}{n} \end{aligned} \tag{S.19}$$

because  $\mathbb{E}(K) \leq n$ . This is a tight lower bound on  $\sum_{k=2}^n \frac{2}{k} p_k$  because when there are no coalescences until the MRCA population of all samples,  $p_n = 1$  and  $p_k = 0$  for  $2 \leq k \leq n - 1$ , and in that case:

$$\sum_{k=2}^n \frac{2}{k} p_k = \frac{2}{n}. \tag{S.20}$$

On the other hand, observe that:

$$\begin{aligned} \sum_{k=2}^n \frac{2}{k} p_k &\leq \sum_{k=2}^n \frac{2}{2} p_k \\ &= \sum_{k=2}^n p_k \\ &= 1. \end{aligned} \tag{S.21}$$

This is a tight upper bound because when all coalescences happen during the

internal branches of the species tree (i.e., no ILS),  $p_2 = 1$  and  $p_k = 0$  for  $3 \leq k \leq n$ , so:

$$\sum_{k=2}^n \frac{2}{k} p_k = 1. \quad (\text{S.22})$$

Thus, we see that:

$$(\text{Maximum ILS}) \quad \frac{2}{n} \leq \sum_{k=2}^n \frac{1}{k} p_k \leq 1 \quad (\text{no ILS}).$$

Using these facts, we we can bound:

$$(\text{No ILS}) \quad \Sigma_{ij}^{(BM)} + 2N\delta_{ij}L\mu\sigma_M^2 \leq \Sigma_{ij} \leq \Sigma_{ij}^{(BM)} + 2NL\mu\sigma_M^2 \left(1 - \frac{2}{n} + \delta_{ij}\right) \quad (\text{Maximum ILS}).$$

Together, these results reveal several important aspects about the impact of ILS. First, it shows that when there is no ILS,  $2N(1 + \delta_{ij})L\mu\sigma_M^2$  is cancelled out by  $2NL\mu\sigma_M^2 \sum_k \frac{2}{k} p_k$ , and  $\Sigma_{ij}$  reduces to  $\Sigma_{ij}^{(BM)}$  for  $i \neq j$  (see main text for a simple worked example). The diagonal entries of  $\Sigma_{ij}$  (i.e., the trait variances in different species), however, will be larger than the corresponding entries of  $\Sigma_{ij}^{(BM)}$  *even in the absence of ILS*. Second, as long as there is any ILS, covariances will be increased relative to Brownian motion. And importantly, because the off-diagonal terms that are added to  $\Sigma_{ij}^{(BM)}$  are independent of  $i$  and  $j$ , we see that the impact of ancestral polymorphism cannot be modeled by simply changing the rate of Brownian motion.

### 2.3.2 Asymptotic behavior when internal coalescence is rare

When the frequency of internal coalescence approaches zero, the variance-covariance matrix converges to a matrix where all diagonal entries are identical and all off-diagonal entries are identical (convergence can be seen for up to 60% discordance in Fig. 5b, main text). Here, we derive the form of the limiting variance-covariance matrix.

Consider that no internal coalescence results in  $p_n = 1$  and  $p_k = 0$  for  $2 \leq k \leq n - 1$ ,

so:

$$\sum_{k=2}^n \frac{2}{k} p_k = \frac{2}{n}. \quad (\text{S.23})$$

So then,

$$\begin{aligned} \Sigma_{ij} &= \Sigma_{ij}^{(BM)} + 2N(1 + \delta_{ij})L\mu\sigma_M^2 - 2NL\mu\sigma_M^2 \frac{2}{n} \\ &= \Sigma_{ij}^{(BM)} + 2NL\mu\sigma_M^2 \left(1 - \frac{2}{n} + \delta_{ij}\right) \\ &\sim 2NL\mu\sigma_M^2 \left(1 - \frac{2}{n} + \delta_{ij}\right), \end{aligned} \quad (\text{S.24})$$

where the asymptotics follow because in order for there to be very low amounts of internal coalescence,  $N$  must be extremely large compared to any of the internal branch lengths.

Thus, the Brownian component of the covariance is negligible.

This formula shows that even in the regime of maximal ILS, in which all coalescences happen in the MRCA of all species and there is no phylogenetic signal, the data are still correlated. This is because in this regime, every pair of lineages will be subtended by the same total (i.e., over all genealogies) expected branch length path, and as a result will share the same non-zero correlation. This pattern is not possible under Brownian motion, where lineages from a star phylogeny will be independent and identically distributed.

## References

- Mendes, F. K. and M. W. Hahn. 2018. Why concatenation fails near the anomaly zone. *Systematic Biology* 67:158–169.
